# Supplementary material for: A T–Hg2+–T metallo-base pair-mediated dual amplification fluorescent strategy for the selective and sensitive detection of Hg2+
Source: Royal Society of Chemistry journal article supplement (doi:10.1039/c6ra14910c), 2016-01-01
Supplement: c6ra14910c1.pdf [file c6ra14910c1.pdf]

**T-Hg<sup>2+</sup>-T metallo-base pair-mediated dual amplification fluorescent  
strategy for the selective and sensitive detection of Hg<sup>2+</sup>**

**Haiping Wei <sup>a</sup>, Lei Wang <sup>b</sup>, Xiaowen Xu <sup>a</sup>, Jing Zhu <sup>a</sup>, Wei Jiang <sup>a,\*</sup>**

*<sup>a</sup> Key Laboratory for Colloid and Interface Chemistry of Education Ministry, School  
of Chemistry and Chemical Engineering, Shandong University, 250100 Jinan, P.R.  
China*

*<sup>b</sup> School of Pharmaceutical Sciences, Shandong University, 250012 Jinan, P. R.  
China*

Corresponding author: Tel: 86-531-88363888; fax: 86-531-88564464.

E-mail: [wjiang@sdu.edu.cn](mailto:wjiang@sdu.edu.cn)

**Table S1** Sequences of oligonucleotides used in this work.

| Name   | Sequence (from 5' to 3')                                                                                      |
|--------|---------------------------------------------------------------------------------------------------------------|
| H-DNA3 | <u>CAT CTC TTC TCC GAG CCG GTC GAA ATA GTG GGT AAT GAA</u><br><u>GAG ATG GTT TCG</u>                          |
| A-DNA3 | CGT TTC CAT CTC TTC AAA AAG                                                                                   |
| H-DNA4 | <u>CAT CTC TTC TCC GAG CCG GTC GAA ATA GTG GGT AAT GAA</u><br><u>GAG ATG GTT TCG G</u>                        |
| A-DNA4 | CCG TTT CCA TCT CTT CAA AAA G                                                                                 |
| H-DNA5 | <u>CAT CTC TTC TCC GAG CCG GTC GAA ATA GTG GGT AAT GAA</u><br><u>GAG ATG GTT TCG GG</u>                       |
| A-DNA5 | CCC GTT TCC ATC TCT TCA AAA AG                                                                                |
| H-DNA6 | <u>CAT CTC TTC TCC GAG CCG GTC GAA ATA GTG GGT AAT GAA</u><br><u>GAG ATG GTT TCG GGG</u>                      |
| A-DNA6 | CCC CGT TTC CAT CTC TTC AAA AAG                                                                               |
| H-DNA7 | <u>CAT CTC TTC TCC GAG CCG GTC GAA ATA GTG GGT AAT GAA</u><br><u>GAG ATG GTT TCG GGG G</u>                    |
| A-DNA7 | CCC CCG TTT CCA TCT CTT CAA AAA G                                                                             |
| H-DNA8 | <u>CAT CTC TTC TCC GAG CCG GTC GAA ATA GTG GGT AAT GAA</u><br><u>GAG ATG GTT TCG GGG GG</u>                   |
| A-DNA8 | CCC CCC GTT TCC ATC TCT TCA AAA AG                                                                            |
| MB     | FAM- <u>CCA CCA CAC TGA AAT TGA CCC ACT AT</u> <u>rA</u> GGA AGA<br>GAT GTT ACG AGG CGG <u>TGG TGG</u> -Dacyl |

<sup>a</sup> The rose domains in H-DNA are DNAzyme sequences. The gold domains and the blue domains in both H-DNA and A-DNA are T-rich sequences and complementary sequences, respectively. And the coffee domains in A-DNA are protection sequences. The red rA of the MB denotes adenosine ribonucleotide at that position. The underlined sequences in H-DNA and MB present

the stem of the structures.

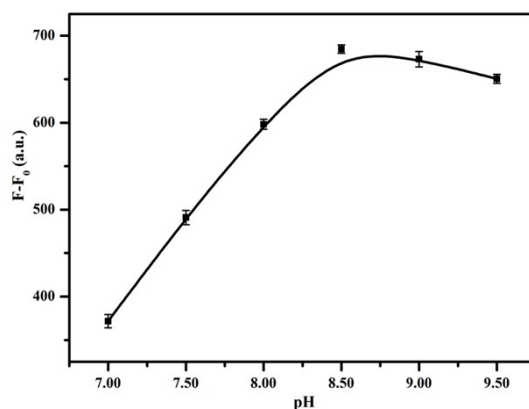

**Fig. S1.** The effect of the pH values of the TM buffer on Fluorescence Increase. Conditions :  $C_{Mg^{2+}} = 5.0 \times 10^{-3} \text{ mol}\cdot\text{L}^{-1}$ ,  $C_{A-DNA} = 1.0 \times 10^{-7} \text{ mol}\cdot\text{L}^{-1}$ ,  $C_{H-DNA} = 1.2 \times 10^{-7} \text{ mol}\cdot\text{L}^{-1}$ ,  $C_{MB} = 1.8 \times 10^{-7} \text{ mol}\cdot\text{L}^{-1}$ , Exo III = 50 U. T-Hg<sup>2+</sup>-T reaction : 60 min, Target cycle : 120 min, DNAzyme cycle : 30 min.

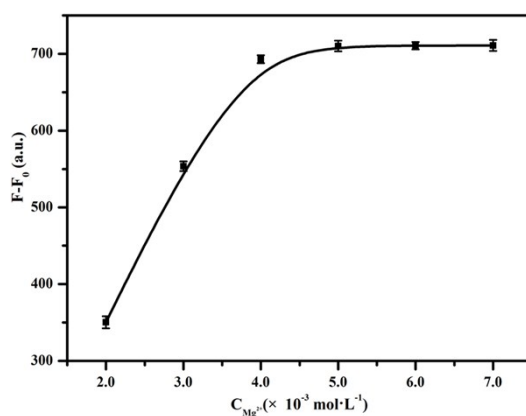

**Fig. S2.** The effect of the ion strengths of the TM buffer on Fluorescence Increase. Conditions : pH = 8.50,  $C_{A-DNA} = 1.0 \times 10^{-7} \text{ mol}\cdot\text{L}^{-1}$ ,  $C_{H-DNA} = 1.2 \times 10^{-7} \text{ mol}\cdot\text{L}^{-1}$ ,  $C_{MB} = 1.8 \times 10^{-7} \text{ mol}\cdot\text{L}^{-1}$ , Exo III = 50 U. T-Hg<sup>2+</sup>-T reaction : 60 min, Target cycle : 120 min, DNAzyme cycle : 30 min.

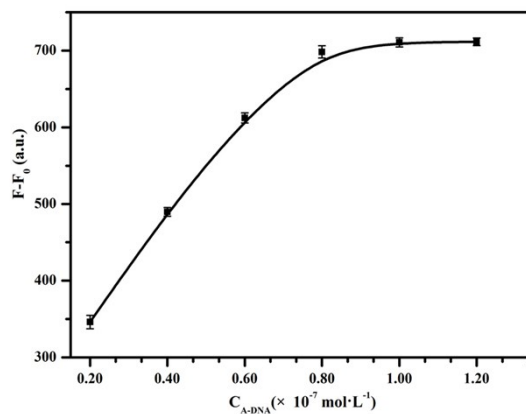

**Fig. S3.** The effect of the A-DNA concentrations on Fluorescence Increase. Conditions : pH = 8.50,  $C_{Mg^{2+}} = 5.0 \times 10^{-3} \text{ mol}\cdot\text{L}^{-1}$ ,  $C_{H\text{-DNA}} = 1.2 \times 10^{-7} \text{ mol}\cdot\text{L}^{-1}$ ,  $C_{MB} = 1.8 \times 10^{-7} \text{ mol}\cdot\text{L}^{-1}$ , Exo III = 50 U. T-Hg<sup>2+</sup>-T reaction : 60 min, Target cycle : 120 min, DNAzyme cycle : 30 min.

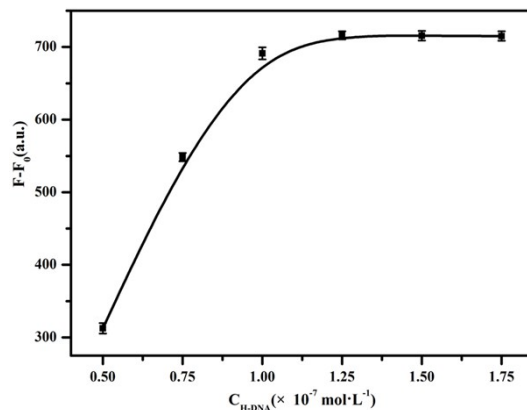

**Fig. S4.** The effect of the H-DNA concentrations on Fluorescence Increase. Conditions : pH = 8.50,  $C_{Mg^{2+}} = 5.0 \times 10^{-3} \text{ mol}\cdot\text{L}^{-1}$ ,  $C_{A\text{-DNA}} = 1.0 \times 10^{-7} \text{ mol}\cdot\text{L}^{-1}$ ,  $C_{MB} = 1.8 \times 10^{-7} \text{ mol}\cdot\text{L}^{-1}$ , Exo III = 50 U. T-Hg<sup>2+</sup>-T reaction : 60 min, Target cycle : 120 min, DNAzyme cycle : 30 min.

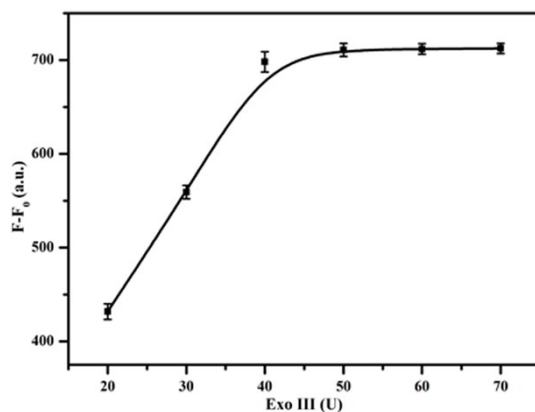

**Fig. S5.** The effect of the amounts of Exo III on Fluorescence Increase. Conditions : pH = 8.50,  $C_{Mg^{2+}} = 5.0 \times 10^{-3} \text{ mol}\cdot\text{L}^{-1}$ ,  $C_{A\text{-DNA}} = 1.0 \times 10^{-7} \text{ mol}\cdot\text{L}^{-1}$ ,  $C_{H\text{-DNA}} = 1.2 \times 10^{-7} \text{ mol}\cdot\text{L}^{-1}$ ,  $C_{MB} = 1.8 \times 10^{-7} \text{ mol}\cdot\text{L}^{-1}$ . T-Hg<sup>2+</sup>-T reaction : 60 min, Target cycle : 120 min, DNAzyme cycle : 30 min.

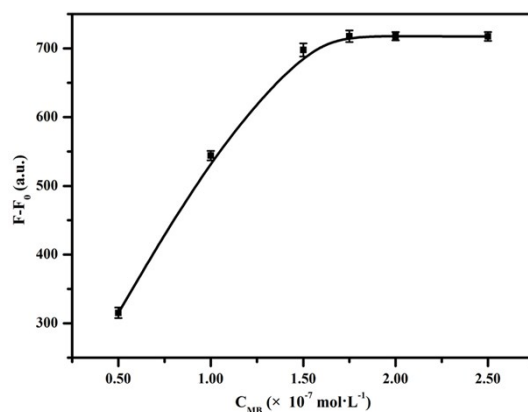

**Fig. S6.** The effect of the MB concentrations on Fluorescence Increase. Conditions : pH = 8.50,  $C_{Mg^{2+}} = 5.0 \times 10^{-3} \text{ mol}\cdot\text{L}^{-1}$ ,  $C_{A-DNA} = 1.0 \times 10^{-7} \text{ mol}\cdot\text{L}^{-1}$ ,  $C_{H-DNA} = 1.2 \times 10^{-7} \text{ mol}\cdot\text{L}^{-1}$ , Exo III = 50 U. T-Hg<sup>2+</sup>-T reaction : 60 min, Target cycle : 120 min, DNAzyme cycle : 30 min.

**Table S2.** Detection of Hg<sup>2+</sup> in environmental water samples using the proposed strategy and ICP-MS method<sup>a</sup>.

| Sample Name  | Added<br>( $\times 10^{-9}$<br>$\text{mol}\cdot\text{L}^{-1}$ ) | Found                                                                       | Found              | Found           | ICP-MS                                                                      | ICP-MS             | ICP-MS          |
|--------------|-----------------------------------------------------------------|-----------------------------------------------------------------------------|--------------------|-----------------|-----------------------------------------------------------------------------|--------------------|-----------------|
|              |                                                                 | Mean <sup>b</sup><br>( $\times 10^{-9}$<br>$\text{mol}\cdot\text{L}^{-1}$ ) | RSD (%)<br>(n = 3) | Recovery<br>(%) | Mean <sup>b</sup><br>( $\times 10^{-9}$<br>$\text{mol}\cdot\text{L}^{-1}$ ) | RSD (%)<br>(n = 3) | Recovery<br>(%) |
| Tap Water1   | 2.5                                                             | 2.4                                                                         | 3.1                | 92              | 2.4                                                                         | 3.8                | 92              |
| Tap Water2   | 8.0                                                             | 8.1                                                                         | 2.3                | 101             | 8.3                                                                         | 2.1                | 104             |
| Lake Water1  | 2.5                                                             | 2.3                                                                         | 2.4                | 92              | 2.4                                                                         | 4.5                | 92              |
| Lake Water2  | 8.0                                                             | 7.9                                                                         | 1.8                | 99              | 8.2                                                                         | 2.5                | 103             |
| River Water1 | 2.5                                                             | 2.4                                                                         | 4.2                | 96              | 2.6                                                                         | 3.3                | 104             |
| River Water2 | 8.0                                                             | 7.8                                                                         | 3.7                | 98              | 7.9                                                                         | 2.9                | 99              |
| Waste Water  | 0                                                               | 7.0                                                                         | 3.5                | NO <sup>c</sup> | 7.1                                                                         | 4.0                | NO <sup>c</sup> |

<sup>a</sup> The Hg<sup>2+</sup> in tap, lake and river water was not detected with the proposed strategy and ICP-MS method.

<sup>b</sup> All found values were obtained as an average of three repetitive determinations.

<sup>c</sup> The results were not obtainable.
